# Supplementary material for: Butanediammonium Salt Additives for Increasing Functional and Operando Stability of Light-Harvesting Materials in Perovskite Solar Cells
Source: Nanomaterials (Basel). 2022 Dec 7;12(24):4357. doi: 10.3390/nano12244357 (PMC9784390; doi:10.3390/nano12244357)
Supplement: Supplementary file 1 [file nanomaterials-12-04357-s001.zip › nanomaterials-2061149-supplementary.pdf]

## Butanediammonium Salt Additives for Increasing Functional and Operando Stability of Light-Harvesting Materials in Perovskite Solar Cells

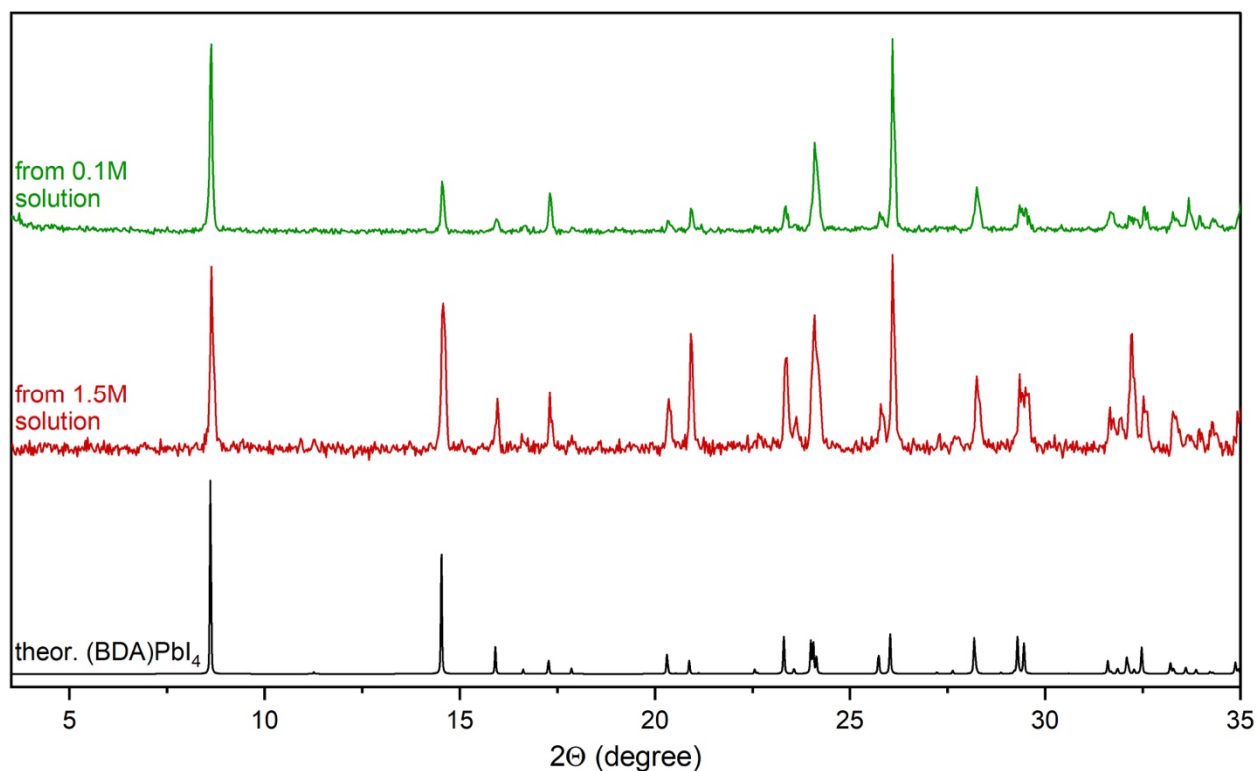

**Figure S1.** Powder XRD patterns of 2D perovskite crystals, prepared from 0.1M (green line) and 1.5M (red line) (BDA)(MA)Pb<sub>2</sub>I<sub>7</sub> solutions. Black line corresponds to theoretical XRD pattern of (BDA)PbI<sub>4</sub> phase.

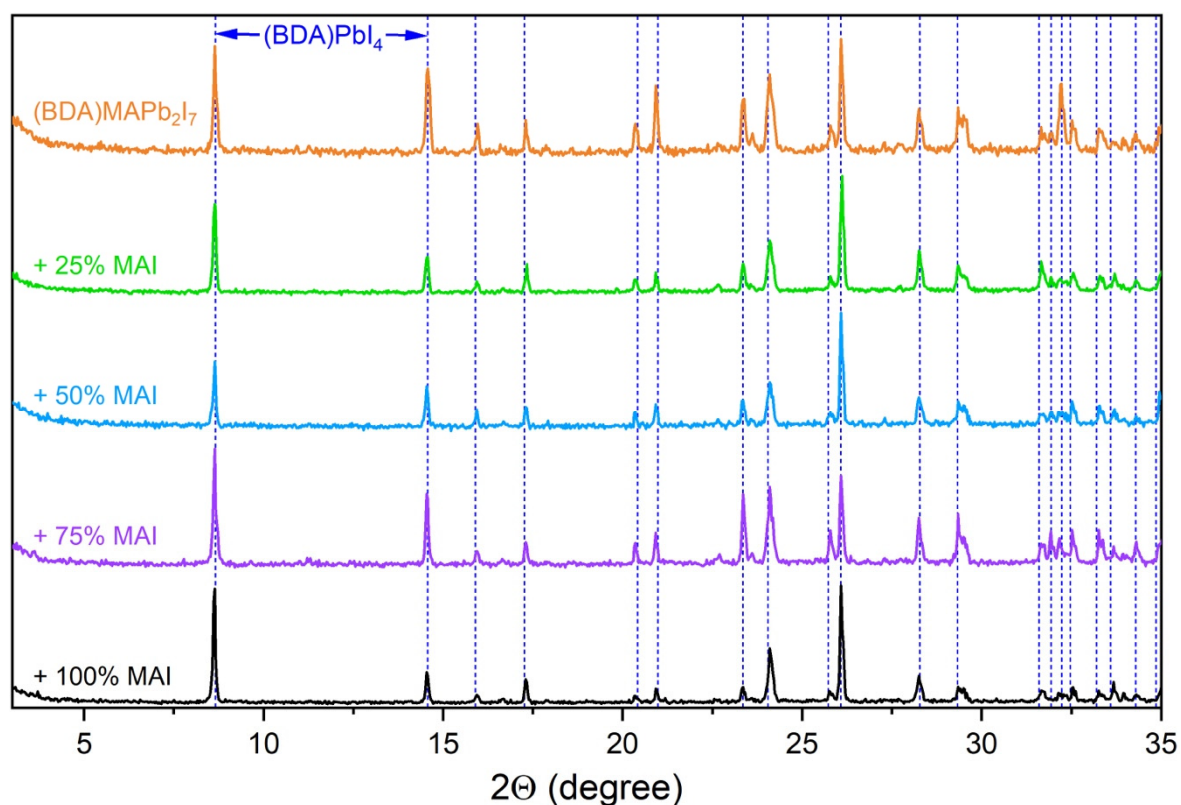

**Figure S2.** Powder XRD patterns of 2D perovskite crystals, prepared from stoichiometric (BDA)(MA)Pb<sub>2</sub>I<sub>7</sub> solution (upper line) and from solutions with different excess of MAI, specified above each line. Vertical dashed lined correspond to the reflexes of (BDA)PbI<sub>4</sub> phase.

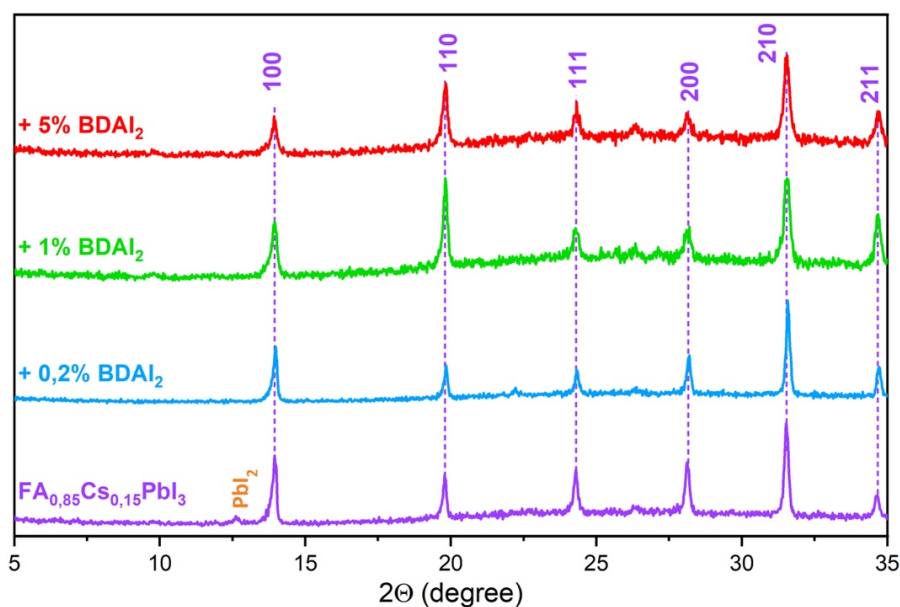

**Figure S3.** XRD patterns of FA<sub>0.85</sub>Cs<sub>0.15</sub>PbI<sub>3</sub> perovskite films with different BDAI<sub>2</sub> content.

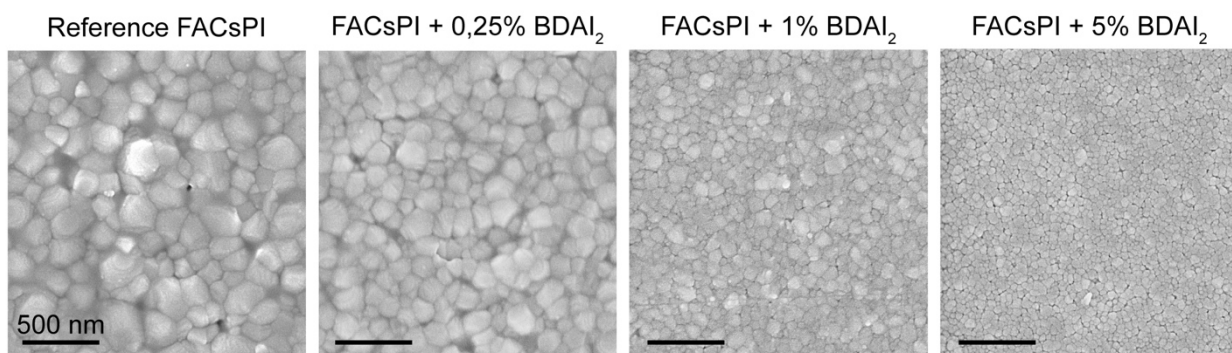

**Figure S4.** SEM images of FACsPI perovskite films with 0, 0.25, 1, and 5% BDAI<sub>2</sub> content.

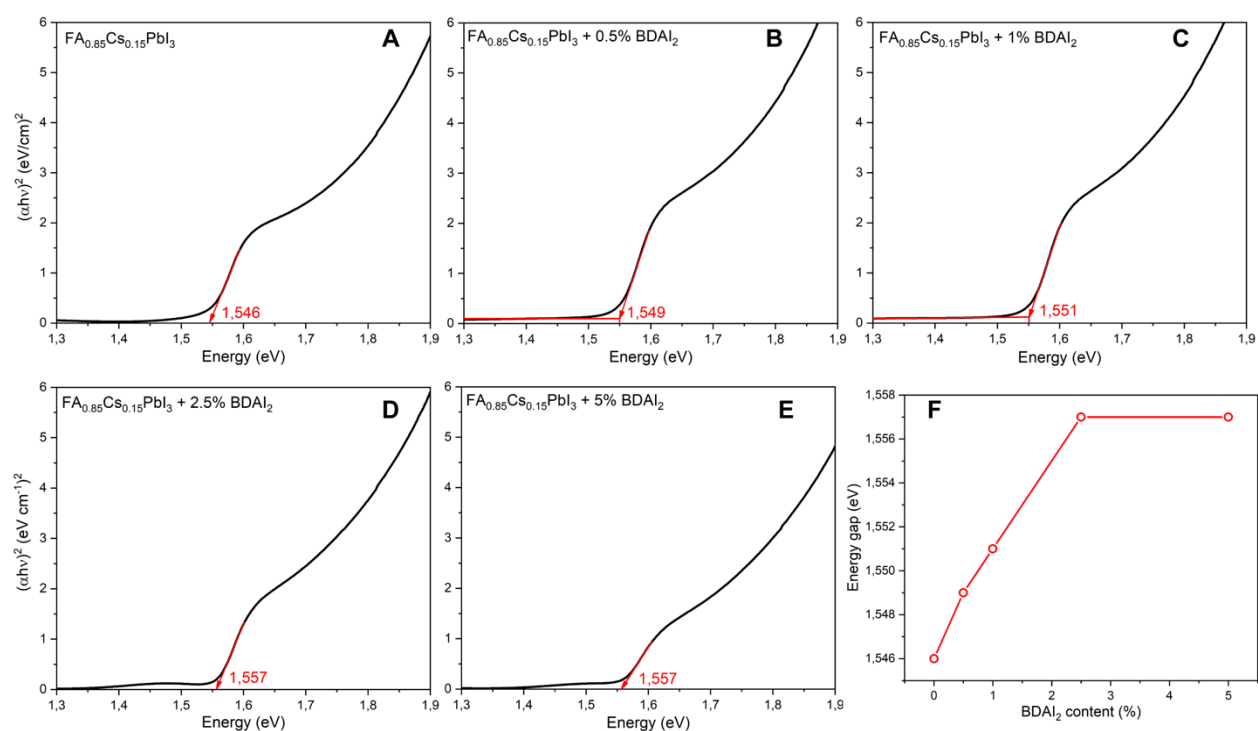

**Figure S5.** (A-E) Tauc plots of FA<sub>0.85</sub>Cs<sub>0.15</sub>PbI<sub>3</sub> perovskite films with different BDAI<sub>2</sub> content. (F) Energy gap of FA<sub>0.85</sub>Cs<sub>0.15</sub>PbI<sub>3</sub> perovskite as a function of BDAI<sub>2</sub> content, calculated from corresponding Tauc plots.

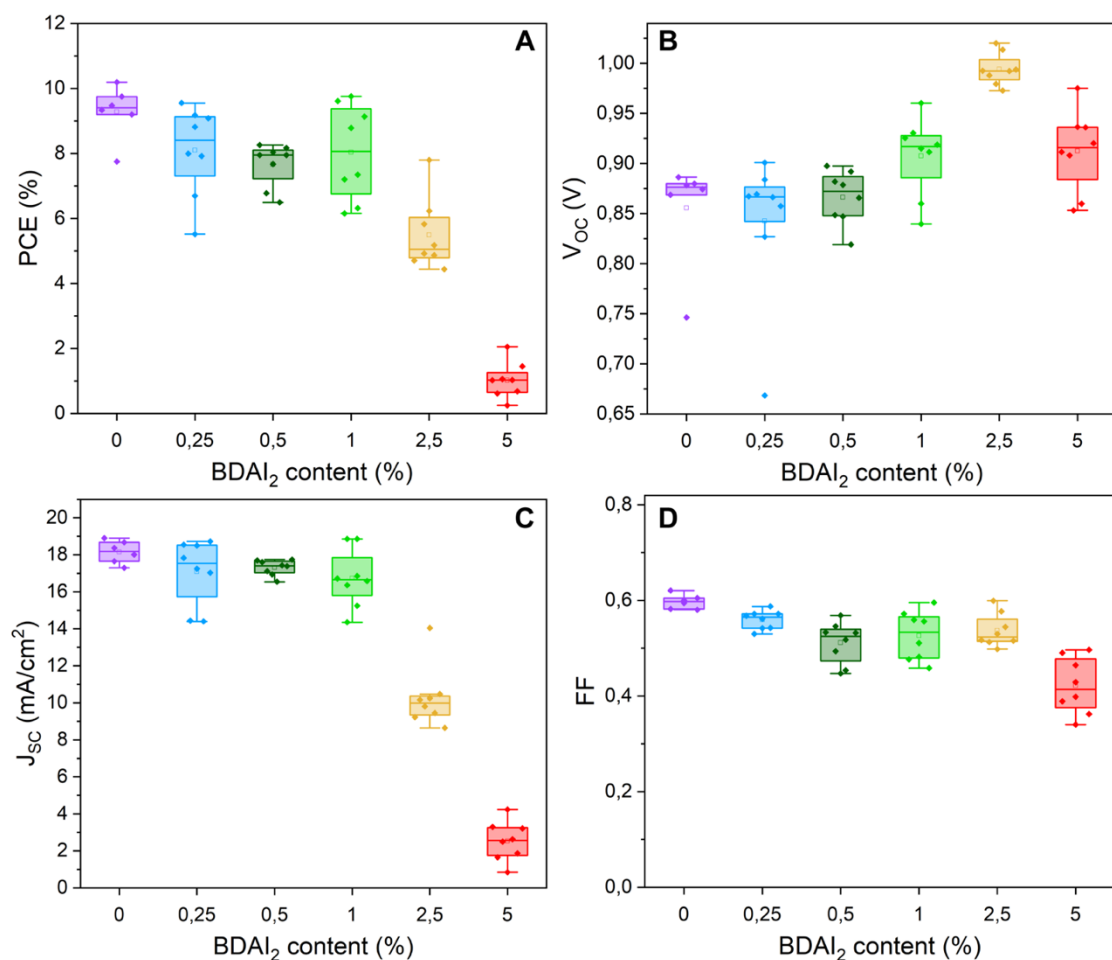

**Figure S6.** Distributions of operando parameters of PSCs based on FACsPI +  $x\%$  BDAI<sub>2</sub> light-harvesting materials: PCE (A),  $V_{oc}$  (B),  $J_{sc}$  (C), and FF (D).

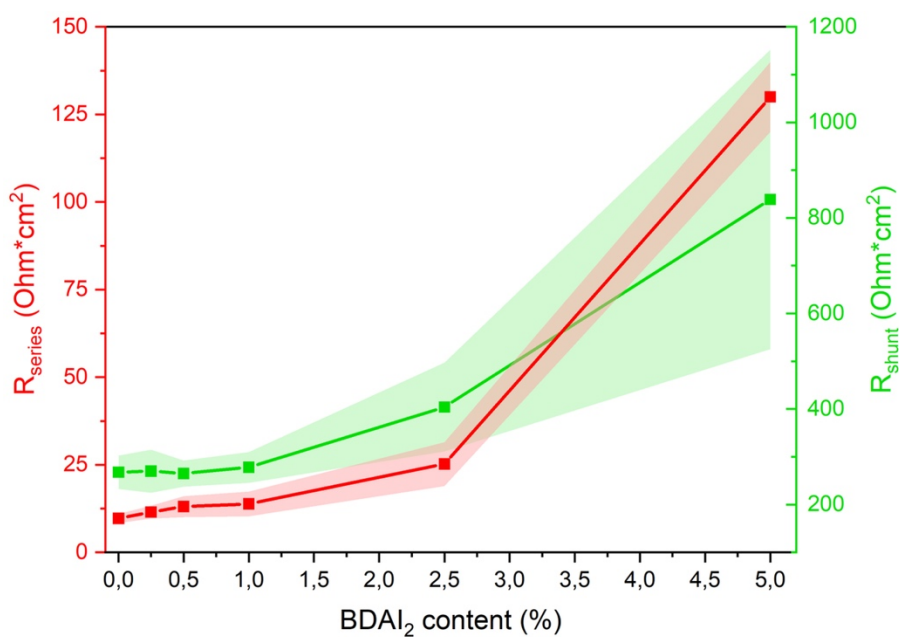

**Figure S7.** The dependence of series resistance (red) and shunt resistance (green) of PSCs on BDAI<sub>2</sub> content, estimated from quasi steady state J-V curves under 1 sun illumination.

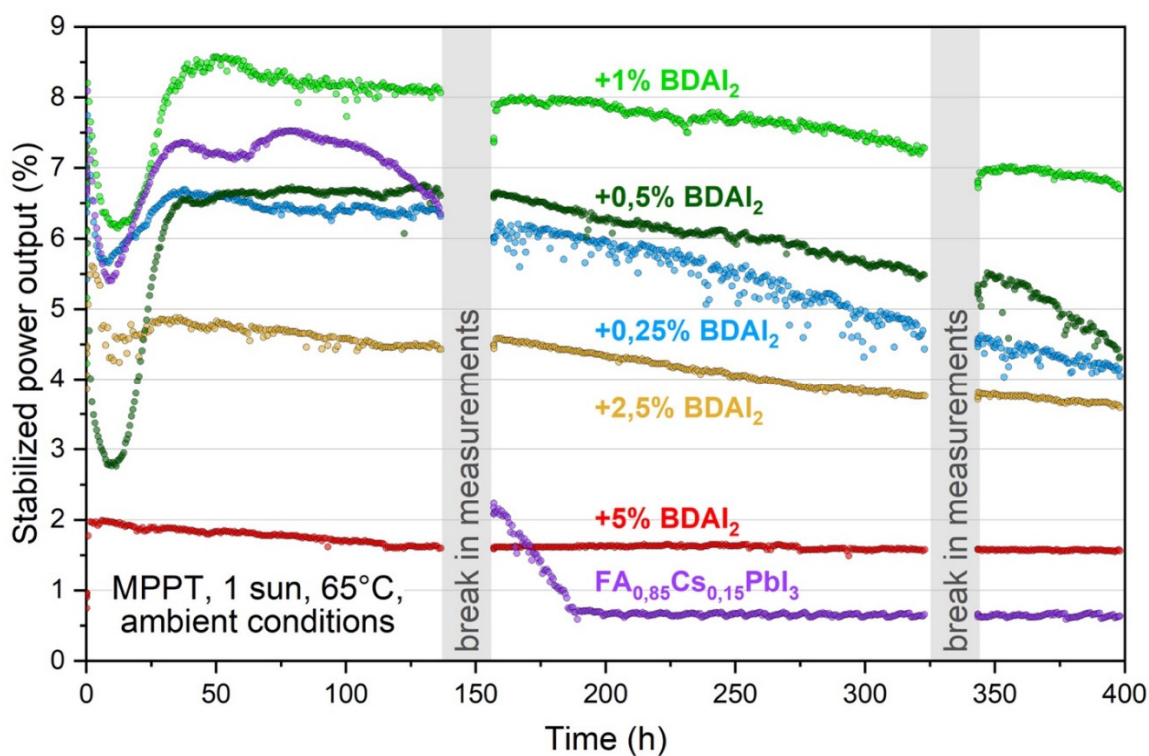

**Figure S8.** Stabilized power output of encapsulated perovskite solar cells with different BDAI<sub>2</sub> amounts under continuous 1 sun illumination, stabilized temperature 65°C, and ambient environment. Twice during the experiment SPO measurements were technically interrupted for several hours with preserved light and heat aging, PSCs during these periods were loaded close to MPP.

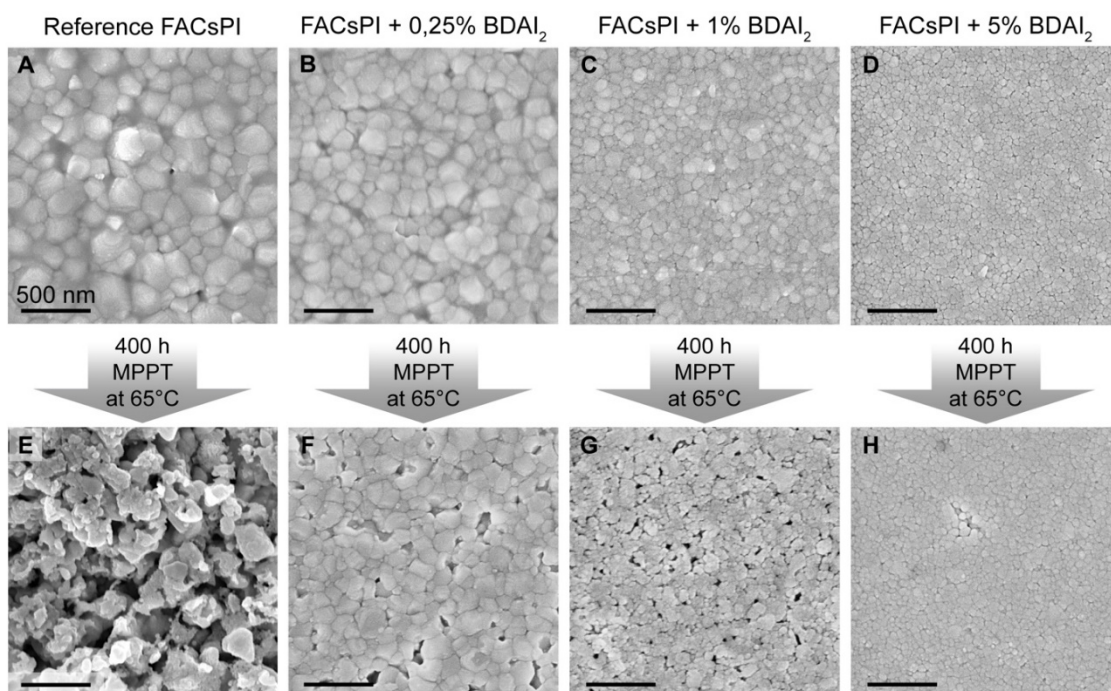

**Figure S9.** SEM images of four FACsPI perovskite films with different BDAI<sub>2</sub> content: 0% (A, E), 0.25% (B, F), 1% (C, G), and 5% (D, H) before (A-D) and after (E-H) 400 hours of MPPT under constant 1 sun illumination and 65°C. All scale bars are 500 nm.
